# Supplementary material for: Structure, magnetism and catecholase activity of the first dicopper(ii) complex having a single μ-alkoxo bridge
Source: Royal Society of Chemistry journal article supplement (doi:10.1039/c4ra14603d), 2014-12-23
Supplement: c4ra14603d1.pdf [file c4ra14603d1.pdf]

## Supplementary Information †

### Structure, magnetism and catecholase activity of the first dicopper(II) complex having a single $\mu$ -alkoxo bridge

Sangita Adhikari,<sup>a</sup> Arnab Banerjee,<sup>a</sup> Sandip Nandi<sup>a</sup>, Matilde Fondo,<sup>b</sup> Jesús Sanmartín-Matalobos\*<sup>b</sup> and Debasis Das\*<sup>a</sup>

<sup>a</sup>Department of Chemistry, The University of Burdwan, Burdwan, 713104, West Bengal, India. E-mail:arnab.ism@gmail.com; ddas100in@yahoo.com; Fax: +91 342 2530452; Tel: +91 342 2533913

<sup>b</sup>Departamento de Química Inorgánica, Facultad de Química, Universidad de Santiago de Compostela, 15782 Santiago de Compostela, Spain, Fax: +34 981 528073 E-mail: jesus.sanmartin@usc.es

**Table S1.** Dependence of initial rates on the concentration of 3,5-DTBC, [conc. of Cu(II) complexes is  $1 \times 10^{-4}$  mol dm<sup>-3</sup>].

| [3,5-DTBC]<br>(mol dm <sup>-3</sup> ) | V (mol dm <sup>-3</sup> s <sup>-1</sup> )<br>complex <b>1</b> | V (mol dm <sup>-3</sup> s <sup>-1</sup> )<br>complex <b>2</b> |
|---------------------------------------|---------------------------------------------------------------|---------------------------------------------------------------|
| 1E-3                                  | 7E-5                                                          | 2.6049E-4                                                     |
| 2E-3                                  |                                                               | 3.564E-4                                                      |
| 3E-3                                  | 1.34E-4                                                       | 4.2946E-4                                                     |
| 5E-3                                  | 1.68E-4                                                       | 4.73E-4                                                       |
| 7E-3                                  | 1.8949E-4                                                     | 4.82E-4                                                       |
| 1E-2                                  | 1.954E-4                                                      | 5.013E-4                                                      |

**Table S2.** Crystal data and structure refinement for **1** and **2**

|                                                   | <b>1</b>                                                                          | <b>2</b>                                                                                       |
|---------------------------------------------------|-----------------------------------------------------------------------------------|------------------------------------------------------------------------------------------------|
| empirical formula                                 | C <sub>14</sub> H <sub>17</sub> CuN <sub>2</sub> O <sub>4</sub> ·ClO <sub>4</sub> | C <sub>35</sub> H <sub>41</sub> Cl <sub>2</sub> Cu <sub>3</sub> N <sub>5</sub> O <sub>18</sub> |
| formula weight                                    | 440.29                                                                            | 1081.25                                                                                        |
| crystal system                                    | Orthorhombic                                                                      | Monoclinic                                                                                     |
| space group                                       | <i>Fdd2</i>                                                                       | <i>P2</i> <sub>1</sub>                                                                         |
| <i>T</i> (K)                                      | 100(2)                                                                            | 100(2)                                                                                         |
| <i>a</i> (Å)                                      | 27.107 (2)                                                                        | 11.1962(5)                                                                                     |
| <i>b</i> (Å)                                      | 42.977 (2)                                                                        | 15.1146(7)                                                                                     |
| <i>c</i> (Å)                                      | 11.7228 (8)                                                                       | 11.9446(5)                                                                                     |
| $\alpha$ (°)                                      | 90                                                                                | 90                                                                                             |
| $\beta$ (°)                                       | 90                                                                                | 94.215(2)                                                                                      |
| $\gamma$ (°)                                      | 90                                                                                | 90                                                                                             |
| Volume (Å <sup>3</sup> )                          | 13656.8 (16)                                                                      | 2015.87(15)                                                                                    |
| <i>Z</i>                                          | 32                                                                                | 2                                                                                              |
| $\mu$ (mm <sup>-1</sup> )                         | 1.48                                                                              | 1.787                                                                                          |
| reflections collected                             | 41818                                                                             | 19831                                                                                          |
| independent reflections                           | 6835<br>[ <i>R</i> <sub>int</sub> = 0.05]                                         | 19831<br>[ <i>R</i> <sub>int</sub> = 0.09]                                                     |
| data/restraints/parameters                        | 41818/ 9 / 539                                                                    | 19831/ 1497 / 578                                                                              |
| final <i>R</i> index [ <i>I</i> > 2σ( <i>I</i> )] | <i>R</i> <sub>1</sub> = 0.0337,<br><i>wR</i> <sub>2</sub> = 0.0635                | <i>R</i> <sub>1</sub> = 0.0525,<br><i>wR</i> <sub>2</sub> = 0.1168                             |
| final <i>R</i> index [ <i>all data</i> ]          | <i>R</i> <sub>1</sub> = 0.0418,<br><i>wR</i> <sub>2</sub> = 0.0665                | <i>R</i> <sub>1</sub> = 0.0698,<br><i>wR</i> <sub>2</sub> = 0.1314                             |

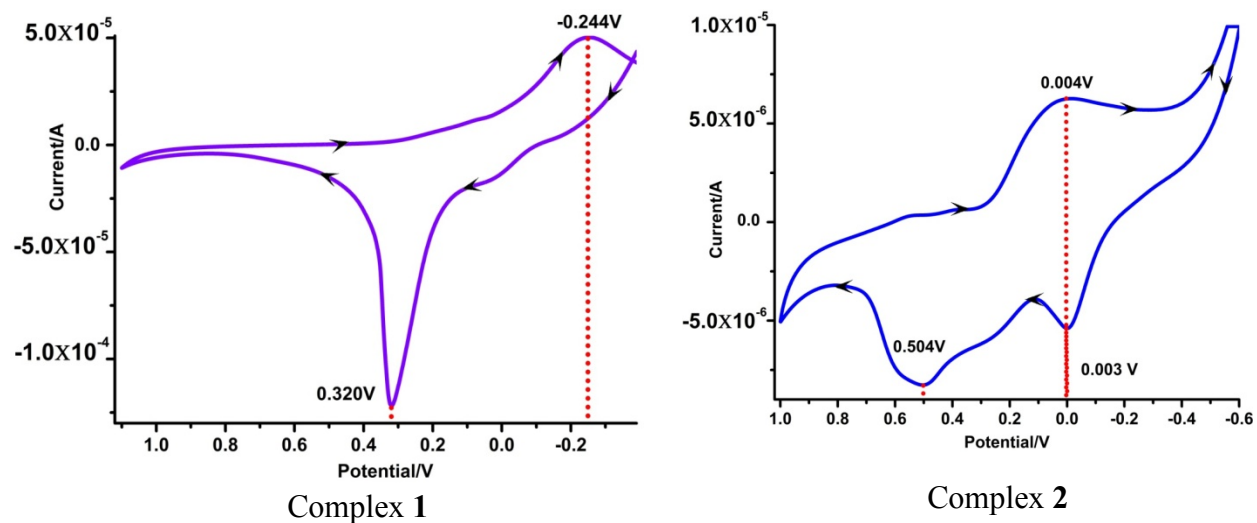

**Fig. S1** Cyclic voltammogram of complexes **1** and **2** in MeOH using 0.1 M TBAP as supporting electrolyte and platinum working electrode (scan rate  $100 \text{ mVs}^{-1}$ ).

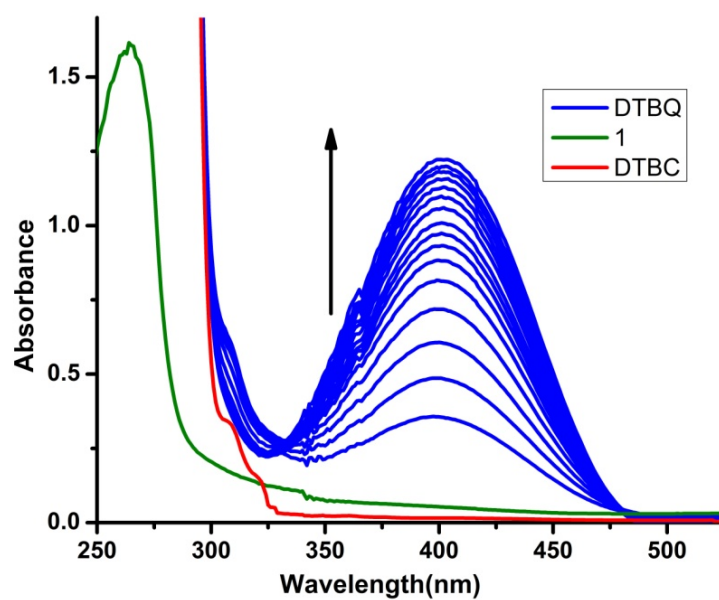

**Fig. S2** Increase in the quinone band at 400 nm after addition of 100 fold 3,5-DTBC ( $1 \times 10^{-2} \text{ M}$ ) to the methanol solution of complex **2** ( $1 \times 10^{-4} \text{ M}$ ). The spectra are recorded at an interval of 5 min.

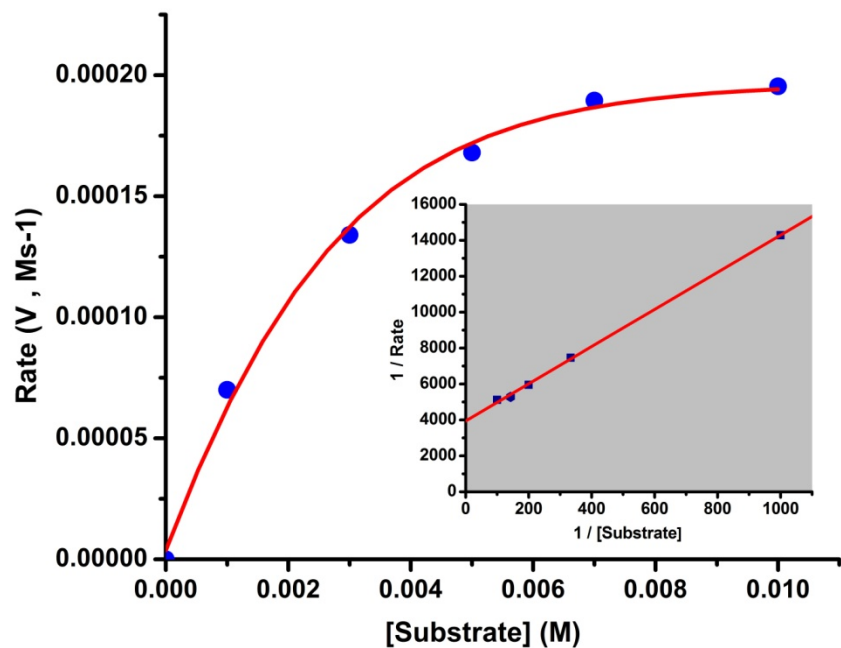

**Fig. S3** Plot of rate vs. substrate concentration for complex **1**. Inset shows Lineweaver–Burk plot.

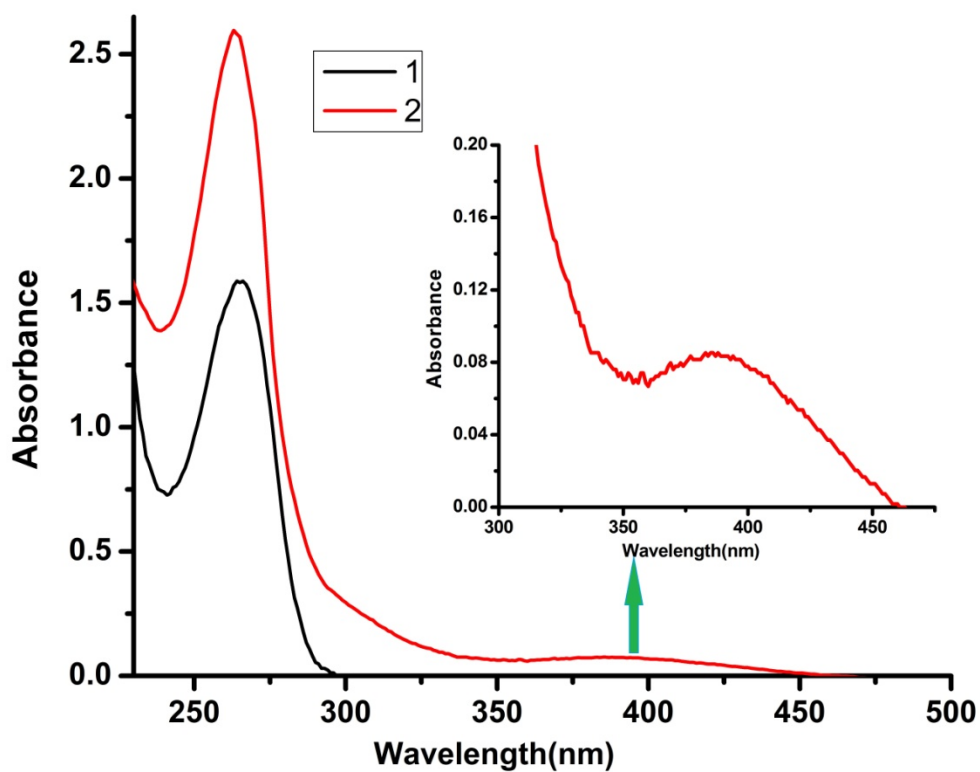

**Fig. S4** UV-Vis spectra of complex **1** and **2** in MeOH ( $[1] = 1 \times 10^{-4}$  M)

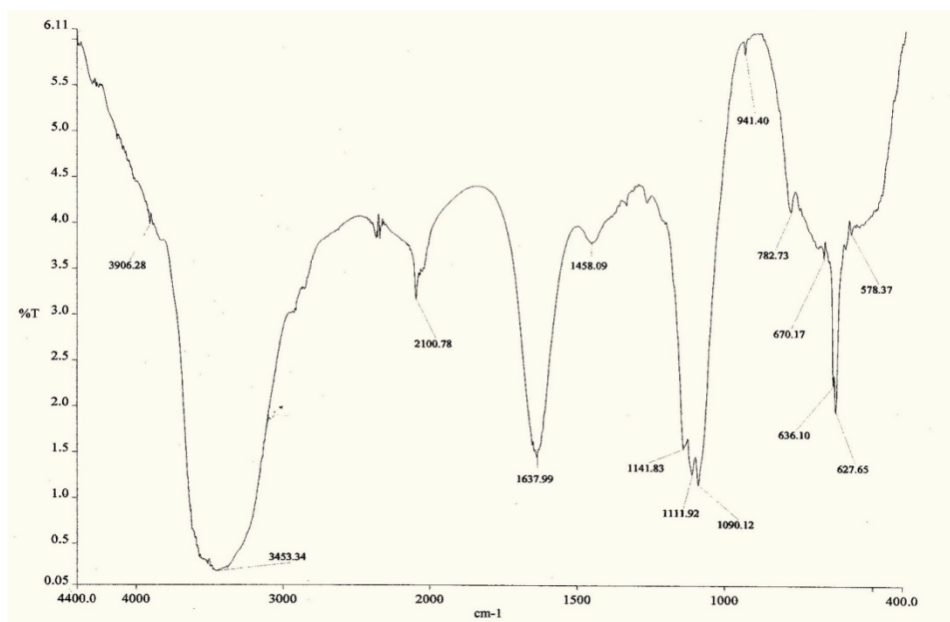

**Fig. S5** FTIR spectrum of **1**

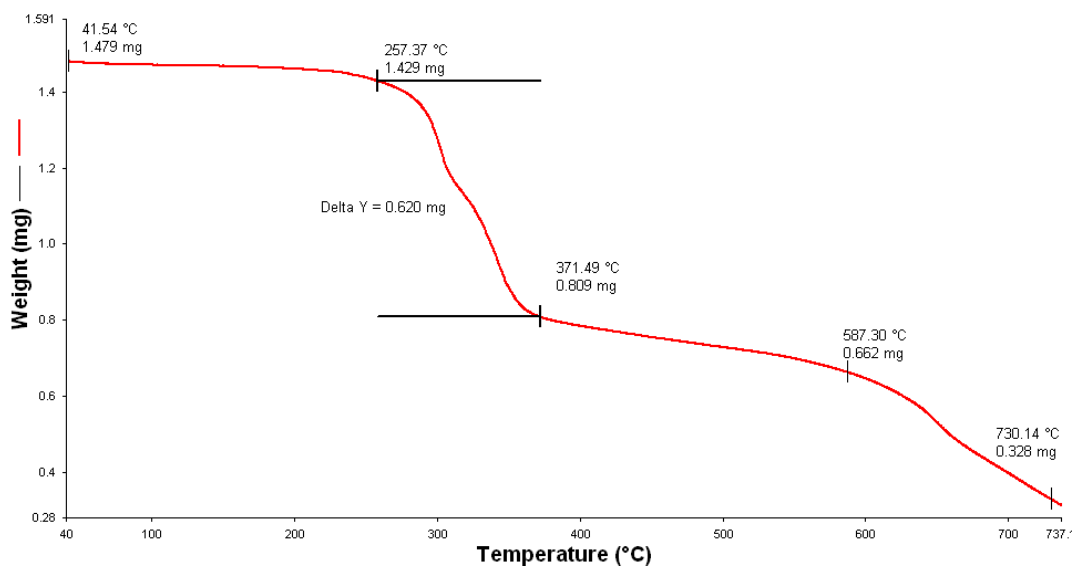

**Fig. S6** Thermogram of **1**

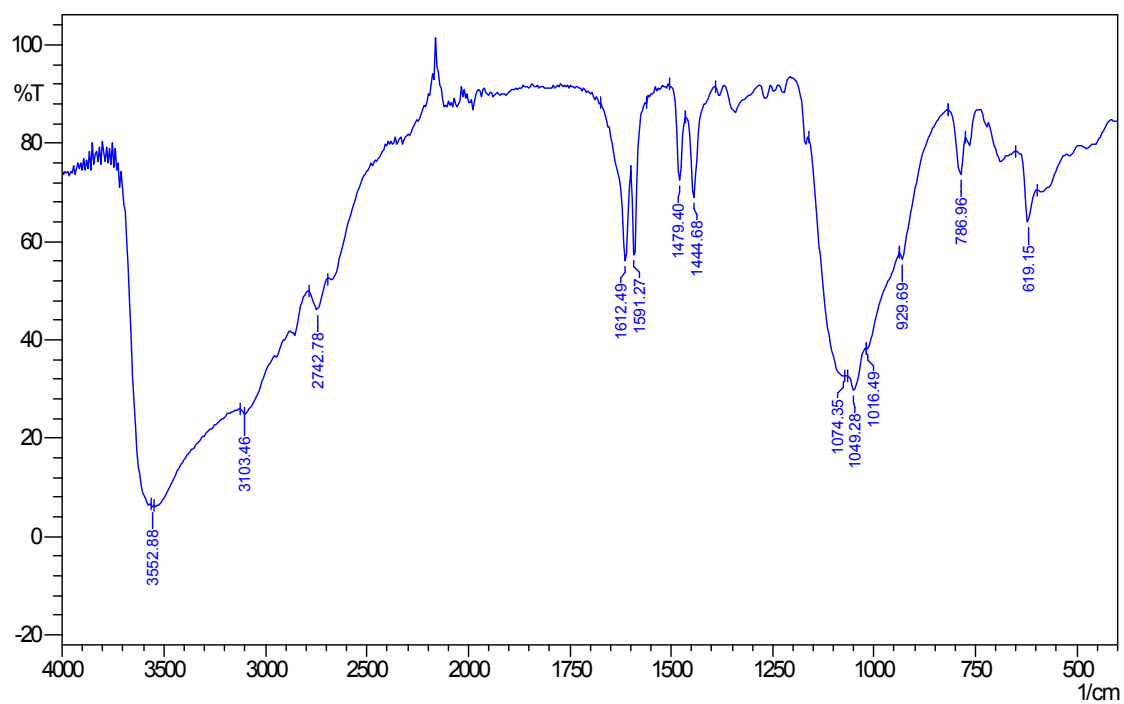

**Fig. S7** FTIR spectrum of **2**

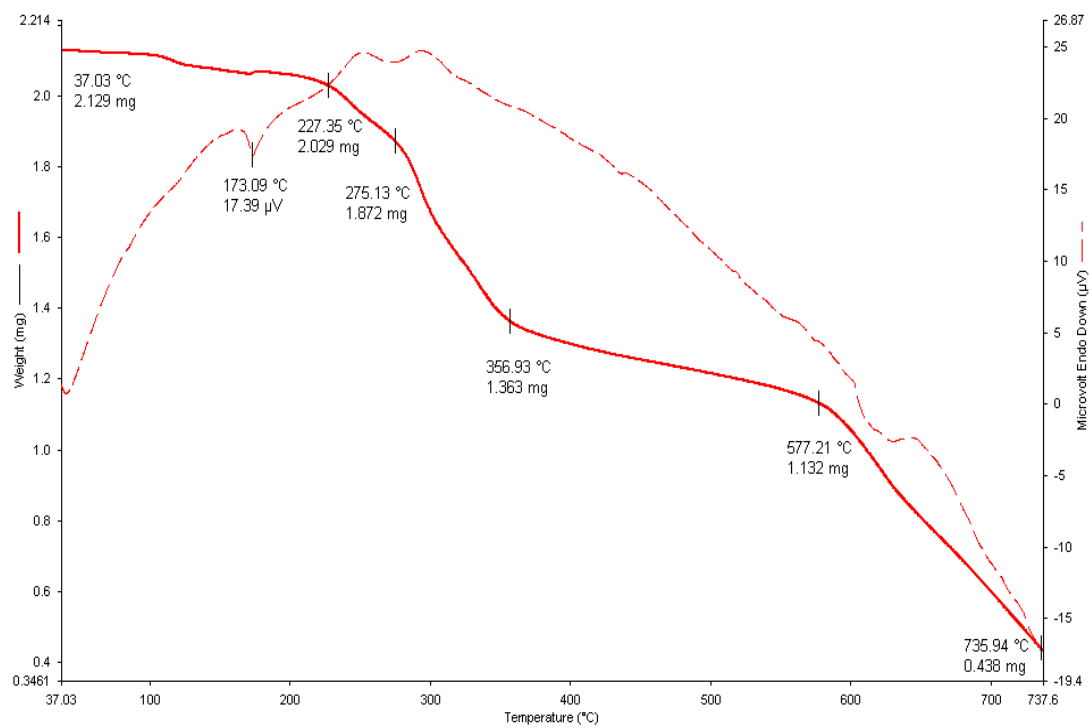

**Figure S8** Thermogram of **2**
